# Supplementary material for: Transitions in chromatin conformation shaped by fatty acids and the circadian clock underlie hepatic transcriptional reorganization in obese mice
Source: Springer Nature journal article supplement (doi:10.1007/s00018-024-05364-3), 2024-07-26

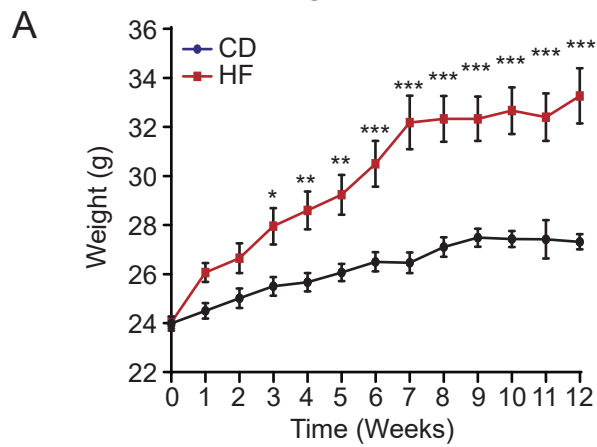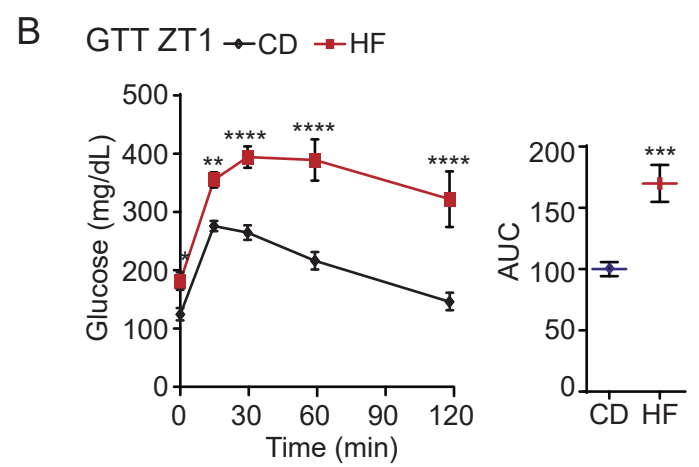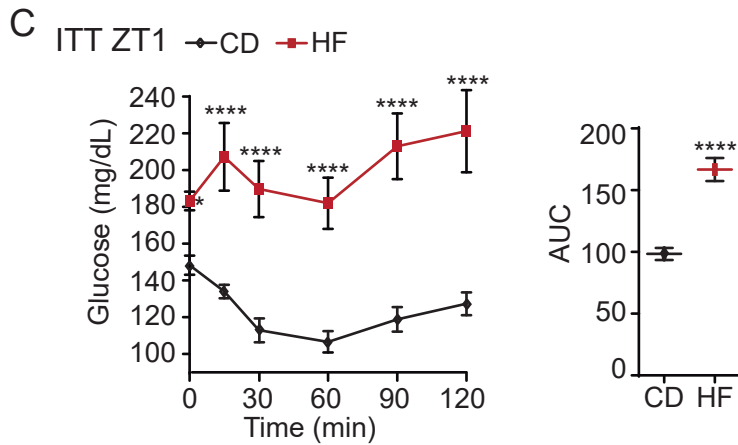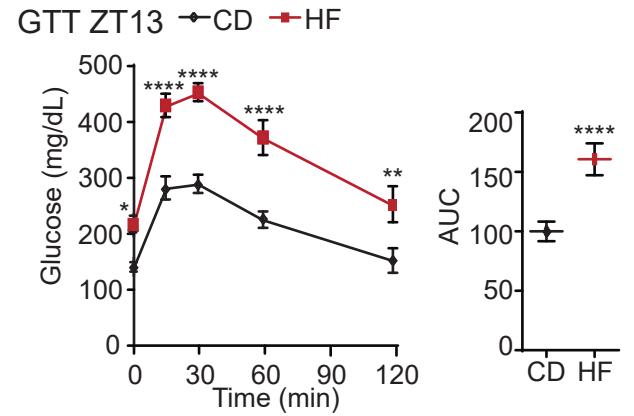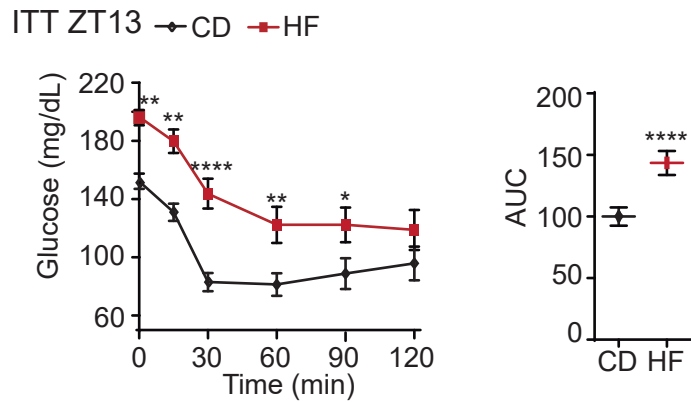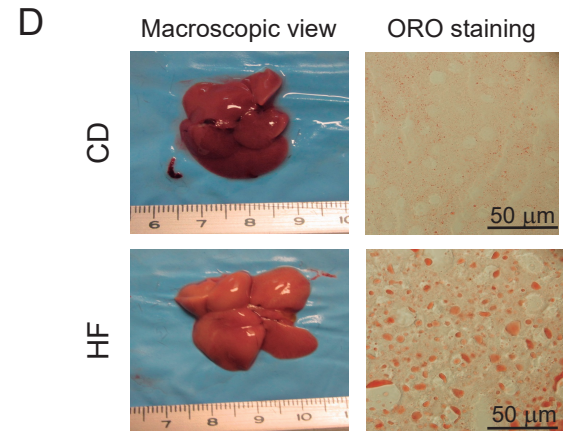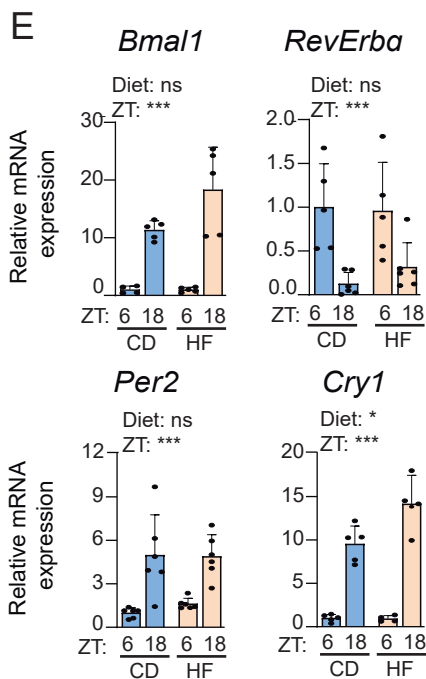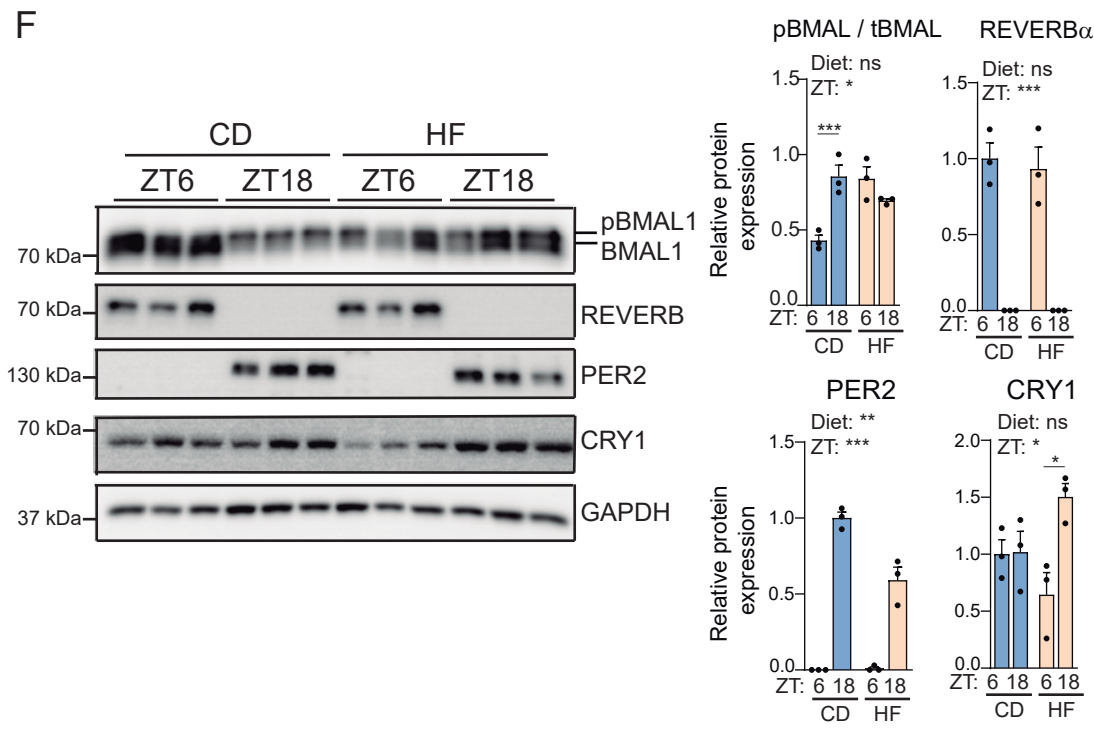

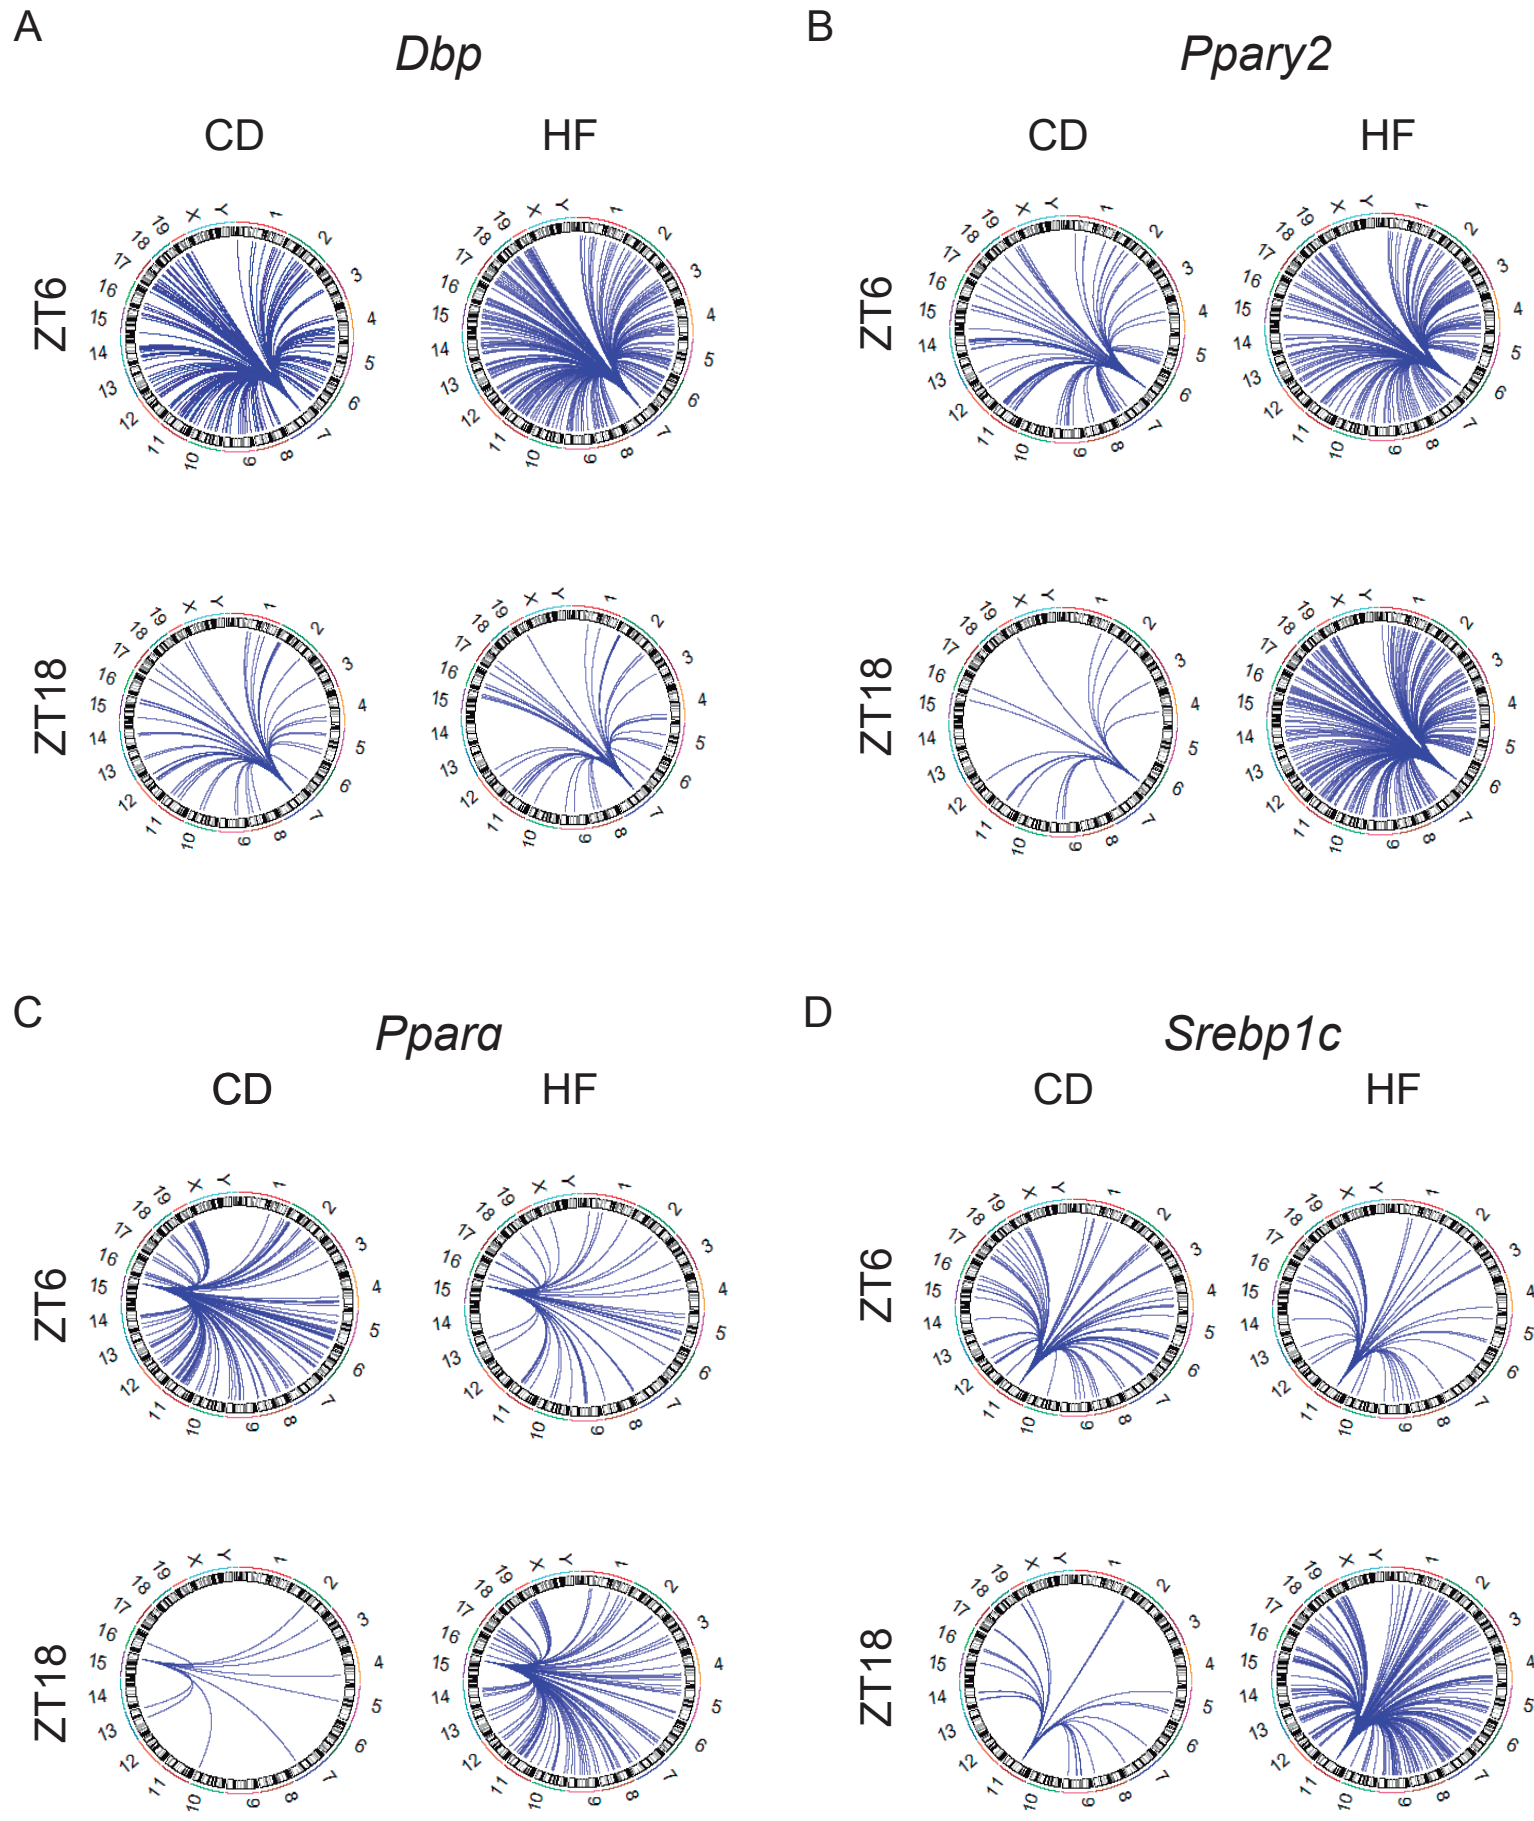

A

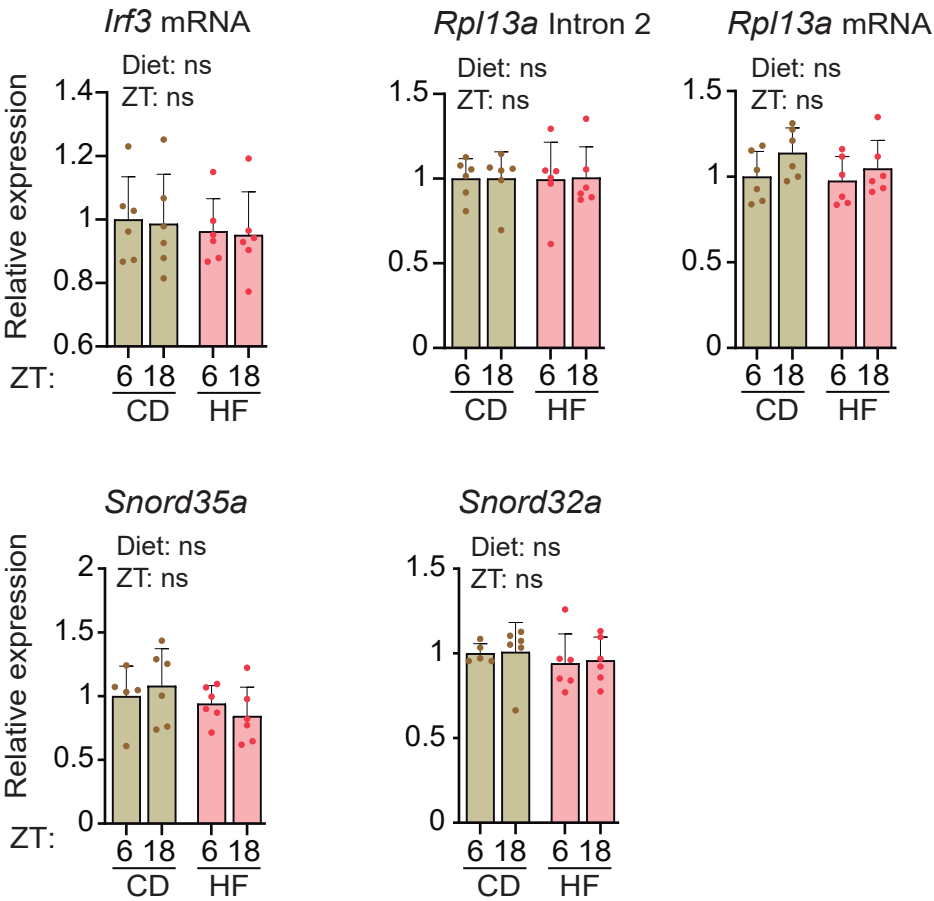

**A**
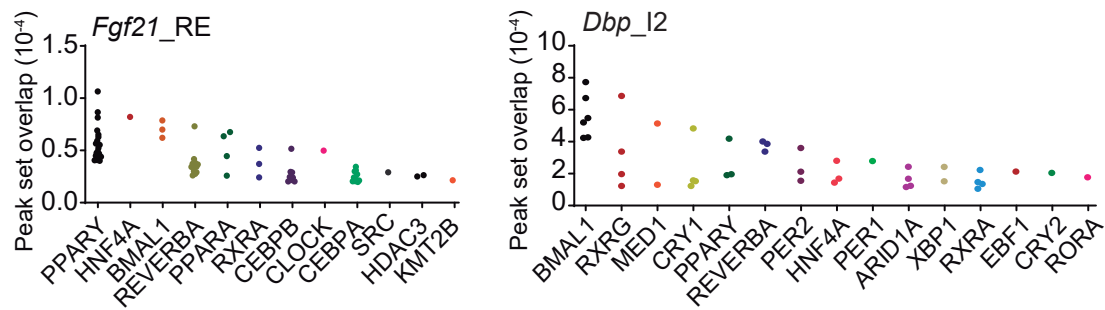
**B**
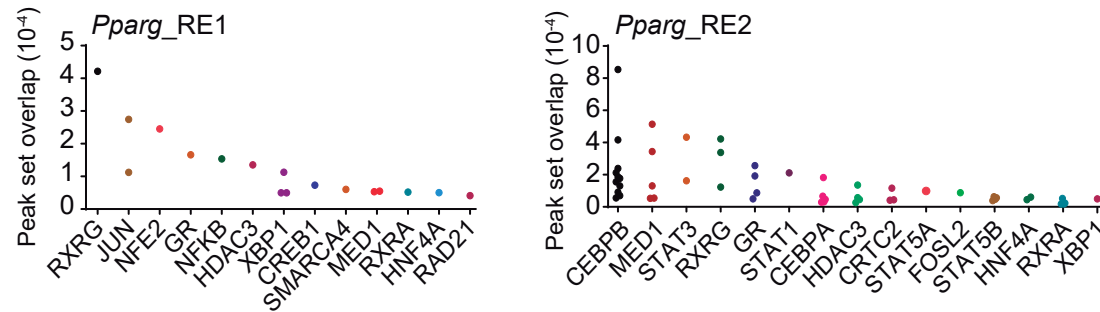
**C**
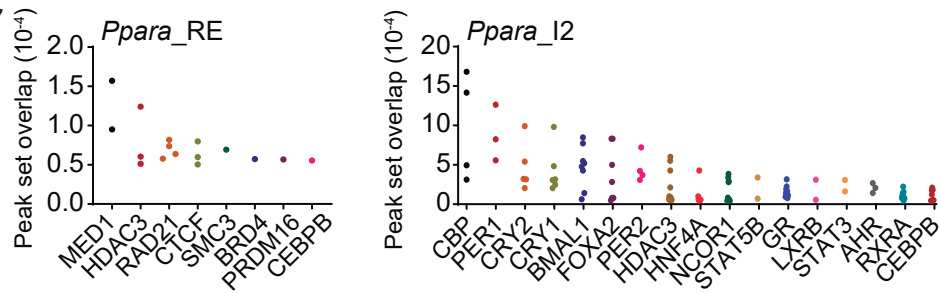
**D**
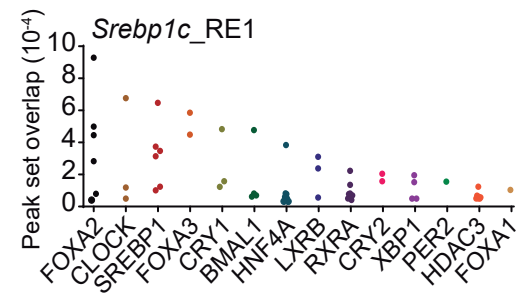



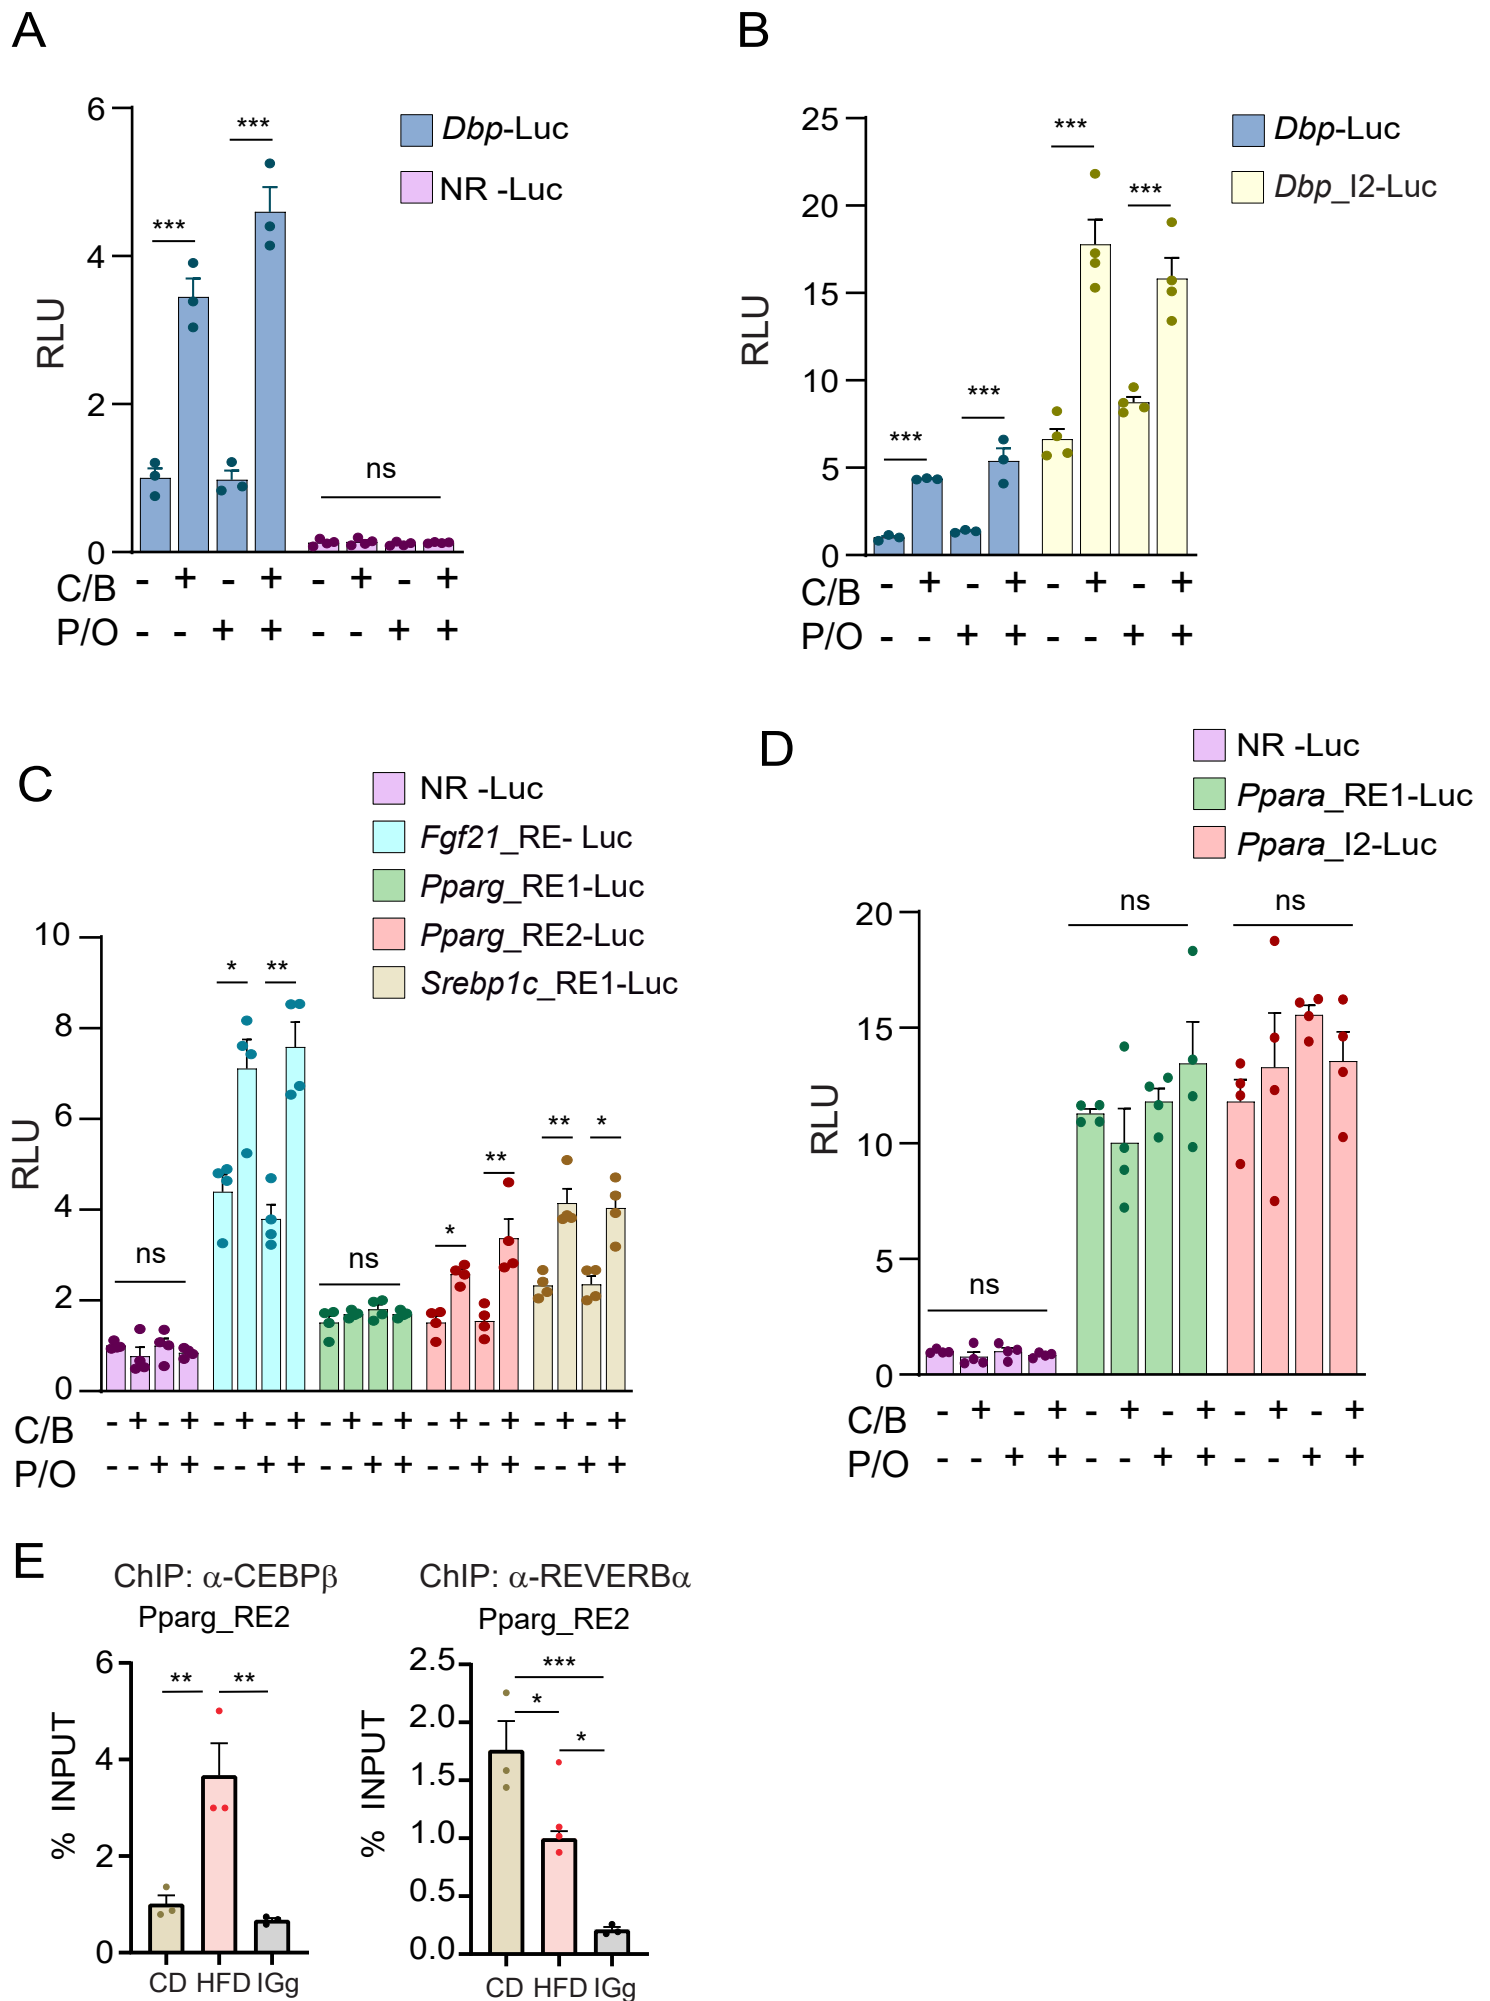

Supplement: MOESM1 [file 18_2024_5364_MOESM1_ESM.pdf › 18_2024_5364_MOESM1_ESM.pdf]
