# Supplementary material for: Transitions in chromatin conformation shaped by fatty acids and the circadian clock underlie hepatic transcriptional reorganization in obese mice
Source: Springer Nature journal article supplement (doi:10.1007/s00018-024-05364-3), 2024-07-26
Supplement: MOESM2 [file 18_2024_5364_MOESM2_ESM.pdf › 18_2024_5364_MOESM2_ESM.pdf]

Table S1 Primer sequences

| qPCR primers        |                                  |                                |
|---------------------|----------------------------------|--------------------------------|
| Gene                | Forward                          | Reverse                        |
| b2m                 | GGTCTTTCTGGTGCTTGTCTCA           | GTTCGGCTTCCCATTCTCC            |
| Cry1                | CTGGCGTGGAAGTCATCGT              | CTGTCCGCCATTGAGTTCTATG         |
| RevErba             | GGGCACAAGCAACATTACCA             | CACGTCCCACACACCTTAC            |
| Per2                | GGCTTCACCATGCCTGTTGT             | GGAGTTATTCGGAGGCAAGTGT         |
| Bmal1               | ATGCAGAACACCAAGGAAGG             | CCATCCTTAGCACGGTGAGT           |
| Ppar $\gamma$ 1     | AGAAGCGGTGAACCACTGATATTC         | AGAGGTCCACAGAGCTGATTCC         |
| Ppar $\gamma$ 2     | TGGGTGAACTCTGGGAGATTC            | AGAGGTCCACAGAGCTGATTCC         |
| Ppar $\gamma$ _I1   | TCTGCTGGGGATCTGAAGGC             | TGTGTAAGAACTTGGGGGCAGTT        |
| Ppar $\gamma$ _I6   | AATCTCAGGTGGCTTTGTGGT            | GTTTTTCCAAATGCTTCCCTTAGT       |
| Dbp                 | AATGACCTTTGAACCTGATCCCGCT        | GCTCCAGTACTTCTCATCCTTCTGT      |
| Dbp_I1              | GTCCACGGCACCTATCAG               | CTCCAGGCGTCAGATTTG             |
| Dbp_I3              | AAGGGCTCAGGTTCCAAG               | GCAGAGGCAGTTCTACAGATG          |
| Ppar $\alpha$       | ACAAGGCCTCAGGGTACCA              | GCCGAAAGAAGCCCTTACAG           |
| Ppar $\alpha$ _I1   | CATTGCTCTGATCGTAGTG              | GGAGGGCAGAGACATAGGGT           |
| Srebp1c             | GGAGCCATGGATTGCACATT             | GGCCCGGGAAGTCACTGT             |
| Srebp1c_I1          | CAGAGGGAAAGCAGAGGATGTGG          | CCACCTTGGGCTGGAATTGGT          |
| Gm36355_I2          | GTGGAGATCGTGTTGCCTGC             | GAGACCCTGAGTTCCATTCCAG         |
| Syn2_I8             | ACTTTCCTGGTGTGGCTGAC             | CGAGCCAGTGTGTTGCTTCCA          |
| Timp4_I2            | CAAAGACCTGCTGACACTCAA            | GTTCTGCTCCCTCCCATAGCAC         |
| Tsen2_I3            | TTCTTTCAGAAAGCCGTCCA             | GCACCAAATGAGAGCGACAC           |
| Fgf21               | TTGACACCCAGGATTTGAATGACC         | GATGACGACCAAGACACTGAAGC        |
| Fgf21_I1            | CCTCCTCCTCTCAACCTCCA             | GATGACGACCAAGACACTGAAGC        |
| Fgf21_I2            | TGAAACCTACGCTCTGTGAGG            | GGTCATTCAAATCCTGGGTGTCAA       |
| Akt1s1              | ATGAGGACGAGCCCACTGAA             | GTCTGTGCTCTCCGGGTCT            |
| Irf_I3              | CGGAAAGAAGTGTGCGGTT              | GTGGAAGTGAGCGTGTAGGT           |
| Irf3                | GCCGAACGAGGTTCAAGGA              | CTCTTCCAGGTTGACACGTCC          |
| Rpl13a              | CCTGCTGCTCTCAAGGTTGTTG           | CCGACCTCATGCGCCAGA             |
| Rpl13a_I1           | TGGGACACTTGCTTCATCTG             | GCCATCCAATACCAGAACCTG          |
| Snord32a            | GGGAGTCCATGATGAGCAACAC           | AGCGGTGCATGGGTTGAT             |
| Snord35a            | CTCAAGACTGGCACATGATGTT           | CCTTGGCATTATCGGCACTG           |
|                     |                                  |                                |
| Enhancer candidates |                                  |                                |
| PPARY2_EN1          | GATCGGTACCAGCTGGTACTCTTGCCACT    | GATCAAGCTTCAATCTTTCCCCCTCCCCAA |
| PPARY2_EN3          | GATCGGTACCATGTCTCCTGTCCCCATCA    | GATCAAGCTTGGGCGGAGGAGGAAGTTTAT |
| PPARY2_EN4          | GATCGGTACCATGTGTTCCCTGCGTTGACA   | GATCAAGCTTCTGAGCCGTATTTCTCCAG  |
| Dbp_EN1             | GATCGGTACCATGGCTGTTTCTCCTGTGTTGA | GATCAAGCTTCTCAGACCAAGGAGCACAG  |
| Dbp_EN2             | GATCGGTACCGCTTCCCATGTCCCTGTGTTG  | GATCAAGCTTGTGTGTCCGAGTCTACTT   |
| Srebp1c_EN1         | GATCGGTACCAGGAAGGGTCAGGGTAGCAT   | GATCAAGCTTTCACCTCAGTTTGGAGCAGC |
| Ppar $\alpha$ _EN1  | GATCGGTACCGCAACCTCTGTATTCCTGAAGA | GATCAAGCTTTCACAGACAGCACCCAGATA |
| Ppar $\alpha$ _EN2  | GATCGGTACCATGGAAGTGATAAGCCCCATCA | GATCAAGCTTGCCTCCCCTGTACCTTTACC |

| 4C DNA amplification primers |                                                               |
|------------------------------|---------------------------------------------------------------|
| Ppar $\gamma$ 2_EcoRI        | TCGTCGGCAGCGTCAGATGTGTATAAGAGACAGGGATTAGTTTTATCTCTATTTAACTTGA |
| Ppar $\gamma$ 2_Csp6I        | GTCTCGTGGGCTCGGAGATGTGTATAAGAGACAGATAGACTTGTTGAATAAATCACCT    |
| Dbp_HindIII                  | TCGTCGGCAGCGTCAGATGTGTATAAGAGACAGAAACCTGTTCTGTGGTGGATAAGC     |
| Dbp_Csp6I                    | GTCTCGTGGGCTCGGAGATGTGTATAAGAGACAGCACTGGTTTTTGCCTGGAGGTC      |
| Ppar $\alpha$ _HindIII       | TCGTCGGCAGCGTCAGATGTGTATAAGAGACAGCATCTCCAGGGTCTCAGTTTGTGA     |
| Ppar $\alpha$ _Csp6I         | GTCTCGTGGGCTCGGAGATGTGTATAAGAGACAGCCATTTTCTACCCTGGCCTGTA      |
| Srebp1c_HindIII              | TCGTCGGCAGCGTCAGATGTGTATAAGAGACAGATCTGTCCCTGTCCCTGCTGG        |
| Srebp1c_Csp6I                | GTCTCGTGGGCTCGGAGATGTGTATAAGAGACAGGGTGTGCGGGTAGCGTCTG         |

| ChIP           |                        |                      |
|----------------|------------------------|----------------------|
| Fgf21 promoter | CCACTCTGACGCGTGATATT   | ATTGCATCATCCGTCCAGGC |
| Dbp I2         | AACAGTGCTGCACATTCCT    | CTCCTCCCAACCAAGCACC  |
| Dbp 3' UTR     | GCCTGGAATGTATGAGCTAGCA | GGCACCGGAGTAGGCAAGA  |
| Pparg RE2      | TGTTTGTTTTAACTACTCTGGA | TCTGCAAATCTGCGAGGGAT |
