# Supplementary material for: Transitions in chromatin conformation shaped by fatty acids and the circadian clock underlie hepatic transcriptional reorganization in obese mice
Source: Springer Nature journal article supplement (doi:10.1007/s00018-024-05364-3), 2024-07-26
Supplement: MOESM3 [file 18_2024_5364_MOESM3_ESM.pdf › 18_2024_5364_MOESM3_ESM.pdf]

| BAIT    | Sample     | MiSeq              |                           |                                                     | HiSeq              |                           |                                                     |
|---------|------------|--------------------|---------------------------|-----------------------------------------------------|--------------------|---------------------------|-----------------------------------------------------|
|         |            | Raw Reads (single) | Percentage of valid reads | Percentage of reads mapped to the bait's chromosome | Raw Reads (paired) | Percentage of valid reads | Percentage of reads mapped to the bait's chromosome |
| Dbp     | CD_ZT6_1   | 527216             | 81.47%                    | 58.63%                                              | 4863932            | 64.95%                    | 51.60%                                              |
|         | CD_ZT6_2   | 309974             | 78.27%                    | 60.64%                                              | 2750690            | 70.26%                    | 61.14%                                              |
|         | CD_ZT18_1  | 242789             | 79.12%                    | 56.93%                                              | 2445516            | 69.98%                    | 53.58%                                              |
|         | CD5_ZT18_2 | 265276             | 80.66%                    | 60.58%                                              | 2364824            | 64.15%                    | 52.76%                                              |
|         | HF2_ZT6_1  | 169290             | 80.71%                    | 60.15%                                              | 1644970            | 73.06%                    | 60.42%                                              |
|         | HF4_ZT6_2  | 336905             | 82.65%                    | 65.92%                                              | 3977224            | 67.18%                    | 59.64%                                              |
|         | HF5_ZT18_1 | 358540             | 81%                       | 60%                                                 | 4839496            | 64.03%                    | 50.50%                                              |
|         | HF6_ZT18_2 | 455179             | 78.83%                    | 59.68%                                              | 4301160            | 62.09%                    | 49.79%                                              |
| Pparg2  | CD_ZT6_1   | 276220             | 78.12%                    | 70.96%                                              | 2566128            | 72.34%                    | 90.48%                                              |
|         | CD_ZT6_2   | 347929             | 70.26%                    | 68.79%                                              | 4058268            | 89.87%                    | 82.38%                                              |
|         | CD_ZT18_1  | 233898             | 73.22%                    | 80.58%                                              | 2821612            | 90.06%                    | 90.39%                                              |
|         | CD5_ZT18_2 | 404843             | 75.40%                    | 64.90%                                              | 3434648            | 92.63%                    | 80.57%                                              |
|         | HF2_ZT6_1  | 134548             | 75.92%                    | 74.76%                                              | 1761798            | 91.57%                    | 84.10%                                              |
|         | HF4_ZT6_2  | 194853             | 70.38%                    | 67.50%                                              | 1798776            | 89.63%                    | 81.88%                                              |
|         | HF5_ZT18_1 | 190469             | 76.31%                    | 65.93%                                              | 2057684            | 92.01%                    | 79.66%                                              |
|         | HF6_ZT18_2 | 116909             | 71.85%                    | 63.89%                                              | 1388736            | 90.87%                    | 81.62%                                              |
| Ppara   | CD_ZT6_1   |                    |                           |                                                     | 55998198           | 60.94                     | 48.28                                               |
|         | CD_ZT6_2   |                    |                           |                                                     | 42724176           | 63.79                     | 39.43                                               |
|         | CD_ZT18_1  |                    |                           |                                                     | 31878820           | 63.24                     | 38.15                                               |
|         | CD5_ZT18_2 |                    |                           |                                                     | 58779518           | 62.75                     | 40.29                                               |
|         | HF2_ZT6_1  |                    |                           |                                                     | 28535284           | 72.66                     | 40.86                                               |
|         | HF4_ZT6_2  |                    |                           |                                                     | 40675704           | 63.85                     | 55.24                                               |
|         | HF5_ZT18_1 |                    |                           |                                                     | 67783622           | 64.83                     | 47.87                                               |
|         | HF6_ZT18_2 |                    |                           |                                                     | 62712786           | 62.78                     | 41.33                                               |
| Srebp1c | CD_ZT6_1   |                    |                           |                                                     | 37296356           | 77.22                     | 62                                                  |
|         | CD_ZT6_2   |                    |                           |                                                     | 22332310           | 73.15                     | 62.31                                               |
|         | CD_ZT18_1  |                    |                           |                                                     | 48289422           | 62.43                     | 49.73                                               |
|         | CD5_ZT18_2 |                    |                           |                                                     | 33443614           | 78.8                      | 55.32                                               |
|         | HF2_ZT6_1  |                    |                           |                                                     | 24107190           | 71.21                     | 64.51                                               |
|         | HF4_ZT6_2  |                    |                           |                                                     | 18151738           | 80.11                     | 71.62                                               |
|         | HF5_ZT18_1 |                    |                           |                                                     | 23262378           | 76.73                     | 57.63                                               |
|         | HF6_ZT18_2 |                    |                           |                                                     | 20166186           | 78.68                     | 54.67                                               |
