# Supplementary material for: Transitions in chromatin conformation shaped by fatty acids and the circadian clock underlie hepatic transcriptional reorganization in obese mice
Source: Springer Nature journal article supplement (doi:10.1007/s00018-024-05364-3), 2024-07-26
Supplement: MOESM4 [file 18_2024_5364_MOESM4_ESM.pdf › 18_2024_5364_MOESM4_ESM.pdf]

| Enhancer         | mm10                         |
|------------------|------------------------------|
| Pparg_RE1        | chr6:115,479,883-115,481,081 |
| Pparg_RE2        | chr6:115,540,986-115,542,182 |
| <i>Ffg21</i> _RE | chr7:45,615,136-45,616,106   |
| Dbp_I2           | chr7:45,707,006-45,708,288   |
| Ppara_RE1        | chr15:85,315,657-85,317,008  |
| Ppara_RE2        | chr15:85,771,214-85,772,193  |
| Srebp1c_RE       | chr11:60,239,955-60,240,932  |
